1 **Bitter stimuli modulate the feeding decision of a blood-sucking insect**  
2 **via two sensory inputs**

3

4

5 Gina Pontes<sup>1,2</sup>, Sebastian Minoli<sup>1,2</sup>, Isabel Ortega Insaurralde<sup>1</sup>, María Gabriela de Brito  
6 Sanchez<sup>3</sup>, and Romina B. Barrozo<sup>1,2\*</sup>

7 <sup>1</sup> Laboratory of Insect Physiology, Dept. of Biodiversity and Experimental Biology,  
8 FCEyN, University of Buenos Aires, Buenos Aires, Argentina

9 <sup>2</sup> IBBEA, CONICET-UBA, Argentina

10 <sup>3</sup> Centre de Recherches sur la Cognition Animale, CNRS - Univ. Paul Sabatier (UMR  
11 5169), Toulouse, France

12

13 \*Corresponding author:

14 Dr. Romina B. Barrozo

15 DBBE, FCEyN, Universidad de Buenos Aires

16 IBBEA, CONICET-UBA

17 Lab. Insect Physiology

18 Ciudad Universitaria - Pab II - 4°Piso

19 Int. Güiraldes 2620

20 Buenos Aires – C1428EHA - ARGENTINA

21 rbarrozo@bg.fcen.uba.ar

22

23

24

25

26 Running title: Bitter perception in a blood feeder

27

28 **Abstract**

29 The gustatory system of animals is involved in the food quality assessment and controls  
30 the feeding decision of an individual confronted to a potential alimentary source.  
31 Triatomines are haematophagous insects that feed on vertebrate's blood. Once they  
32 reach a potential host, they walk over their skin searching for an adequate site to pierce.  
33 Then, they insert their stylets and take a first sampling gorge to decide if food is  
34 acceptable or not. Our work reveals that the presence of bitter compounds inhibits the  
35 feeding behavior of these bugs. Firstly, triatomines decreased their feeding behavior if  
36 substrates spread with quinine or caffeine were detected by external receptors localized  
37 exclusively in the antennae. Morphological inspections along with electrophysiological  
38 recordings revealed the existence of four gustatory sensilla located in the tip of the  
39 antenna that respond to both bitter tastants. The absence of these bitter detectors by  
40 antennal ablation reversed the observed feeding inhibition evoked by bitter compounds.  
41 Secondly, once triatomines pumped the first volume of food with bitter compounds  
42 (quinine, caffeine, berberine, salicin), a decrease in their feeding behavior was observed.  
43 Morphological inspections revealed the existence of 8 gustatory sensilla located in the  
44 pharynx that might be responsible for the internal bitter detection. Finally, we found that  
45 a brief pre-exposure to bitter compounds negatively modulates the motivation of bugs to  
46 feed on an appetitive solution. Results presented here highlight the relevance of bitter  
47 taste perception in the modulation of the feeding behavior of a blood-sucking insect.

48 Key words: feeding behavior, bitter, taste sensilla, plasticity, blood-sucking

49  
50  
51  
52  
53  
54  
55  
56  
57  
58  
59  
60  
61

62 **List of Abbreviation:**

|    |      |                                                 |
|----|------|-------------------------------------------------|
| 63 | AS   | Appetitive solution                             |
| 64 | ANT- | Blocked antennal input                          |
| 65 | ATP  | Adenosine 5'-triphosphate disodium salt hydrate |
| 66 | BER  | Berberine chloride hydrate                      |
| 67 | CAF  | Caffeine                                        |
| 68 | GRN  | Gustatory receptor neuron                       |
| 69 | QUI  | Quinine hydrochloride                           |
| 70 | SAL  | D-(-) salicin                                   |
| 71 | SEM  | Scanning electronic microscopy                  |
| 72 | WAT  | Water                                           |
| 73 | INT  | Intact animal                                   |
| 74 | LEG- | Blocked legs input                              |
| 75 | HT   | Heat                                            |

76

77 **Introduction**

78 Taste provides reliable information about the quality of food and can contribute to  
79 discriminate between nutrient and harmful feeding sources. If food quality assessment is  
80 followed by an associated decision-making, this process might acquire important  
81 physiological consequences for animals. For example, in order to prevent the ingestion  
82 of toxic food, the gustatory system of an individual can detect the presence of particular  
83 substances or tastes that signalize toxicity. Many toxins or poisonous substances have  
84 bitter taste for humans. Although there is no chemical identity uniqueness for bitter  
85 compounds (they are defined anthropocentrically as substances perceived by our  
86 gustatory sense as bitter), most of them have been shown to elicit rejection or aversive  
87 behaviors in many mammals and insects (Yarmolinsky et al., 2009). Bitter perception  
88 might have then evolved as a key defense mechanism against the ingestion of harmful  
89 substances.

90 In insects, the detection of tastants starts primarily at the gustatory receptor neurons  
91 (GRNs) located within taste hairs or sensilla that occur externally in different parts of  
92 the body and appendages (e.g. legs, antennae, proboscis, margin of wings or ovipositor,  
93 among others) (reviewed in Chapman, 2003). Each GNR is tuned to a particular taste  
94 modality (e.g. salt, sweet, bitter) by the presence of specific membrane gustatory  
95 receptor proteins (GRs) (Clyne et al., Dunipace et al., 2001, Scott et al., 2001,  
96 Robertson et al., 2003). Different groups of phytophagous insects belonging to different  
97 orders such as orthopterans, lepidopterans, coleopterans and dipterans (Chapman et al.,  
98 1991; Schoonhoven and van Loon, 2002, Messechendorp et al., 1998, Meunier et al.,  
99 2003) have bitter-sensitive GRNs that elicit aversive responses when activated. Bitter  
100 substances are biologically relevant in animal-plant relationships, as many plants  
101 produce these substances for protection from herbivores and insect pests (Wittstock  
102 and Gershenson. 2002), and can modulate the feeding behavior of phytophagous insects  
103 (Bernays and Chapman, 2000; Gegear et al., 2007; Glendinning, 2001).

104 The gustatory perception of blood-sucking insects has received so far little attention.  
105 During the late 60's and up to the 80's, several groups were focused in identifying an  
106 adequate dietary composition to artificially breed haematophagous insects. As a result,  
107 the characterization and identification of phagostimulants have been largely reported in  
108 different groups of blood-feeders (Galun, 1967; Galun and Kindler, 1968; Friend and

109 Smith, 1971; Friend and Stoffolano, 1983; Galun, et al., 1988). In most of these cases,  
110 the presence of adenosine nucleotides, like ATP (adenosine triphosphate) or other  
111 similar purinergic compounds, seemed to be decisive for food acceptance (Friend, 1965;  
112 Friend and Smith, 1971; Smith and Friend, 1982; Galun et al., 1985). On the contrary,  
113 less information is available about the existence of anti-feedant compounds for  
114 haematophagous insects and their influence in their food preferences (Ignell et al., 2010;  
115 Kessler et al., 2013). New upcoming data in mosquitoes showed the occurrence of  
116 *Drosophila* orthologous GRs genes (Kent et al 2008, Bohbot et al 2014, Sparks et al  
117 2014) that might share similar function, like the one required for caffeine detection  
118 (Sparks et al 2013).

119 *Rhodnius prolixus* (Stål) is a triatomine bug, vector of the Chagas disease in Latin  
120 America (WHO, 2012). As many other blood-feeders, they find their hosts by following  
121 host-emitted cues like CO<sub>2</sub>, chemical volatiles (short-chain carboxylic acids, L-lactic  
122 acid), water vapor and heat (Flores and Lazzari, 1996; Guerenstein and Guerin, 2001;  
123 Barrozo et al., 2003; Barrozo and Lazzari, 2004 a, b; 2006). Triatomines feed  
124 exclusively on vertebrates' blood. Once they find a potential host, triatomines start a  
125 feeding process that involves several steps. First, they walk over the host skin and seek  
126 for a place to puncture in search of blood, using mainly their fine thermal sense to find  
127 subcutaneous hot blood vessels (Ferreira et al., 2007). However, up to now it was still  
128 uncertain if these insects make use of other sensory inputs (e.g. gustatory or olfactory)  
129 to determine the quality of the substrate. Then, if the insect decides to puncture the  
130 host's skin, and once the maxillae and mandible are inside the host body forming the  
131 alimentary canal, the cibarial pump musculature produces contractions, sucking firstly a  
132 small quantity of blood. Only if the ingested blood fulfils the insect's feeding  
133 requirements the animal continues feeding, if not the animal leaves the host and search  
134 for another one (Smith and Friend, 1970).

135 Despite the accumulated knowledge about how blood-feeders find a host and which are  
136 the olfactory relevant host-emitted cues used to accomplish this task, much less  
137 information is available about how do they assess the quality of the food and ultimately  
138 how do they choose a host based on their gustatory preferences. We postulate that the  
139 gustatory sense might be important at two different instances of the feeding behavior: 1-  
140 once the insect reaches the host skin and has to decide whether to pierce or not; 2- once  
141 it takes a first gorge of blood and has to decide if the diet is adequate or not.

142 In this work, we investigated the effects that different bitter tastants might exert in  
143 modulating the decision-making of triatomines during two discrete phases of the  
144 feeding process: the *substrate probing phase* (1) and the *sampling phase* (2).  
145 Furthermore, we looked for the chemosensory organs involved in the detection of these  
146 aversive compounds at both levels. Finally, we evaluated whether the feeding response  
147 of these insects can be modulated by a previous chemical experience to bitter  
148 compounds.

149

150 **Results**

151 In this work we analyzed the role of the gustatory sense in the feeding decision of a  
152 blood-feeding insect. We studied how *R. prolixus* assesses the food quality at two  
153 moments of the feeding process: 1- once the insect reaches the host skin and by external  
154 contact estimates the quality of a potential food source (we named this phase as the  
155 *substrate probing phase*, results are presented in Part I); 2- once the bug has pierced the  
156 host skin and taken a first gorge of blood to decide if the diet is adequate or not (the  
157 *sampling phase*, results presented in Part II). In particular, we analyzed whether these  
158 haematophagous insects perceive bitter compounds and how do these compounds  
159 modulate their feeding behavior.

160 **Part I: Can an external chemical assessment of the substrate modulate the feeding**  
161 **decision of insects?**

162 The decision of a haematophagous insect about to pierce or not might be mediated by  
163 taste receptors that could be present in any part of their body. Up to date no reports have  
164 focused on the importance that external taste sensors might have as a primary detection  
165 system controlling food preferences in blood-sucking insects. Likewise, it is unknown  
166 which compounds might be detectable and how this gustatory input might affect the  
167 feeding decision of triatomines.

168 ***Effect of bitter compounds on the external assessment of a potential food source***

169 This series of experiments was designed to determine if the presence of bitter  
170 compounds spread over the piercing mesh (and not in the feeding solution) can prevent  
171 the feeding response of insects offered with an appetitive solution (AS).

172 About 55% of the insects ingested at least one time their own weight of AS (Fig. 1,  
173 horizontal line) when the piercing mesh was spread with water (WAT). The addition of  
174 10 mM or 100 mM of quinine (QUI) or caffeine (CAF) to the piercing mesh evoked a  
175 significant decrease in the feeding response of bugs as compared to WAT (QUI 10 mM  
176 and 100 mM vs. WAT:  $X^2_{(1)}= 8.94$ ,  $p= 0.002$ ,  $X^2_{(1)}= 6.79$ ,  $p= 0.009$ , respectively; CAF  
177 10 mM and 100 mM vs. WAT:  $X^2_{(1)}= 4.94$ ,  $p= 0.02$ ;  $X^2_{(1)}= 8.93$ ,  $p= 0.002$ , respectively).  
178 Contrarily, no effect of spreading the mesh with 1 mM solutions of any of both  
179 compounds was observed (n.s. in both cases). Similar response thresholds were  
180 obtained when QUI or CAF were spread over the mesh.

181 ***Location of the external bitter-compounds detectors***

182 We showed in the previous section that the contact with a substrate added with QUI or  
183 CAF prevents feeding in these bugs. In this section, by selectively blocking the sensory  
184 inputs of their legs or antennae, we analyzed which chemosensory organs might be  
185 involved in the gustatory input associated with feeding. In a control group, insects were  
186 kept intact (INT). In another group, in order to obstruct putative gustatory inputs  
187 coming from the legs, tibiae and tarsi were painted with acrylic paint 24 h before the  
188 assays (LEG-). On a third group, to block gustatory inputs from the antenna, the last  
189 segment was cut off 24 h prior to the feeding tests (ANT-). Different methodology to  
190 block peripheral inputs from legs and antennae was applied because preliminary  
191 experiments showed that insects could easily withdraw the acrylic paint from their  
192 antennae with their forelegs (and not from their tarsi). On the other hand, cutting the  
193 tarsi impeded the correct locomotion of bugs. All insects were then allowed to feed  
194 from an AS with the piercing mesh spread with water (WAT), QUI (100 mM) or CAF  
195 (100 mM) (Fig. 2).

196 As shown before, the presence of QUI or CAF over the piercing mesh inhibited feeding  
197 of intact animals (INT). When the gustatory input from their legs was blocked (LEG-), a  
198 similar inhibition was evoked for QUI and CAF as compared to WAT series ( $X^2_{(1)}=$   
199 3.94,  $p= 0.04$  and CAF  $X^2_{(1)}= 7.48$ ,  $p= 0.0062$ , respectively). Conversely, insects  
200 deprived from their last antennal flagellum ingested as much AS in WAT assays as in  
201 QUI or CAF assays (ANT-, n.s.). These results suggest that the antennal gustatory input  
202 but not the information coming from legs or proboscis are involved in external bitter  
203 detection in these haematophagous insects.

204 ***Bitter detection of antennal taste-sensilla***

205 The morphology of the whole antennae of *R. prolixus* has already been described by  
206 other authors (Catalá, 1994; Insauti et al., 1999). In our work, the screening of the last  
207 flagellum of the antennae by means of SEM revealed the presence of 4 chaetic sensilla  
208 with a terminal pore that surpass the edge of the antenna (Fig. 3A). Although the  
209 morphology of these sensilla suggests a contact chemoreception or gustatory function,  
210 before this work there were no functional studies that confirmed this assumption.

211 In single-sensillum recordings we stimulated these 4 sensilla with KCl (conductive  
212 electrolyte), QUI or CAF (Fig. 3B,C). We found that both bitter compounds tend to



213 modify the activity of sensory neurons in a dose-dependent manner (Fig. 3B), although  
214 statistical differences were only detected for CAF 1 mM ( $W= 40$ ,  $p= 0.01$ ). However,  
215 the low response of neurons stimulated with 1 mM of QUI was somehow surprising.  
216 With our results we cannot affirm whether there is an inhibitory effect in the firing rate  
217 of the neuron or instead if a deleterious effect is occurring. These results show for the  
218 first time a gustatory function of these chaetic sensilla and established their capacity of  
219 detecting bitter compounds.

### 220 *Effect of a previous antennal contact with bitter compounds in subsequent feeding* 221 *decisions*

222 Here, we analyzed if a brief pre-exposure to bitter compounds can modulate the  
223 motivation of bugs to feed on AS. During pre-exposure, insects were allowed to walk  
224 for 30s over the piercing mesh spread with WAT, QUI or CAF and then transferred to a  
225 clean insect's recipient for either 3 min or 60 min, until the feeding tests were carried  
226 out. In tests carried out 3 min after pre-exposure (Fig. 4A), significantly less insects fed  
227 on AS when pre-exposed to QUI or CAF as compared to those pre-exposed to WAT  
228 ( $X^2_{(1)}= 10$ ,  $p= 0.0016$  and  $X^2_{(1)}= 11.92$ ,  $p= 0.0006$ , respectively). Notice here that  
229 feeding avoidance occurred even if bitter compounds were absent during tests. In  
230 addition, this inhibitory effect vanished 60 min after pre-exposure as no significant  
231 differences with WAT-pre-exposed insects were observed (Fig. 4B, n.s.).

232 To verify that these inhibitory results were not due to the persistence of QUI or CAF  
233 from the pre-exposure procedure in the peripheral receptors, immediately after pre-  
234 exposure to QUI or CAF the last flagella of both antennae were cut off. Then, the  
235 insects' feeding behavior was tested in the artificial feeder. Results show that bugs pre-  
236 exposed to QUI or CAF still fed less frequently over a clean mesh than WAT-pre-  
237 exposed bugs (Fig. 4C,  $X^2_{(1)}= 4.59$ ,  $p= 0.032$  and  $X^2_{(1)}= 5.93$ ,  $p= 0.016$ , respectively),  
238 even if during tests there were no longer antennal inputs. The feeding inhibition evoked  
239 by a previous contact with bitter compounds seems to be under brain control rather than  
240 under peripheral modulation.

### 241 **Part II: Can internal bitter detection during food ingestion modulate the feeding** 242 **decision of insects?**

243 In the previous section we showed that external chemoreception plays a relevant role in  
244 the assessment of a potential food source in triatomines. According with previous

245 reports, once triatomines pierce their host's skin, they first pump a small quantity of  
246 blood, presumably to assess its properties (Bennet-Clark, 1963) and decide whether to  
247 continue with the alimentation or not. The presence of internal chemosensory structures  
248 in the epipharynx of other species of triatomines has been reported (Barth, 1952;  
249 Bernard 1974).

### 250 ***Effect of bitter compounds on the internal assessment of a food source quality***

251 In this series of experiments, different bitter compounds were added to the AS (and not  
252 over the piercing mesh) and the feeding response of insects was analyzed. Insects were  
253 individually placed in the artificial feeder filled with the AS alone or added with QUI,  
254 CAF, BER or SAL (0.000001 to 1 mM in all cases).

255 As previously observed, a high percentage of insects (55%) fed on the AS (Fig. 5A,  
256 horizontal line). However, an inhibitory feeding effect was found when bitter  
257 compounds were individually added to the AS. QUI and SAL were the most potent  
258 inhibitory compounds presenting the lower thresholds of aversion, i.e. <0.00001 mM  
259 (lower dose significantly different from AS, QUI 0.00001 mM,  $X^2_{(1)}= 8.94$ ,  $p= 0.0028$ ;  
260 SAL 0.00001 mM,  $X^2_{(1)}= 4.94$ ,  $p= 0.02$ ). The other bitter compounds also exhibited  
261 inhibitory effects, although with response thresholds below 0.01 mM for CAF (lower  
262 dose significantly different from AS, CAF 0.01 mM,  $X^2_{(1)}= 4.94$ ,  $p= 0.02$ ) and 0.0001  
263 mM for BER (BER 0.0001 mM,  $X^2_{(1)}= 8.94$ ,  $p= 0.0028$ ).

264 The internal detection of bitter compounds present in the food should take place  
265 somewhere in the alimentary canal (Fig. 5B). Although no functional studies were done  
266 so far, we revealed by means of SEM the existence of 8 based-articulated short-peg  
267 sensilla (2-3  $\mu\text{m}$  height and 2  $\mu\text{m}$  at the base) with a unique pore at the end, localized  
268 antero-dorsally inside the alimentary canal (epipharynx) of *R. prolixus* (Fig. 5C,D).

### 269 ***Effect of a previous ingestion of bitter compounds in subsequent food acceptance***

270 Here, we analyzed if a brief ingestion of QUI and CAF before the feeding tests could  
271 modulate the posterior ingestion of the AS. Insects were allowed to feed during 30 s on  
272 the AS alone (control group) or on the AS added with QUI (0.00001 mM) or CAF (0.01  
273 mM). Provided the fine sensitivity of these insects to the thermal cues, a group was pre-  
274 exposed only to the heat emanated by the artificial feeder (HT). Feeding tests on the AS  
275 were carried out after 3 min or 60 min following the pre-exposure.

276 About 65% of the insects fed on the AS after pre-exposure to HT or AS, and no  
277 differences were detected among these groups (Fig. 6A, n.s.). Conversely, the previous  
278 ingestion of QUI or CAF 3 min before the feeding tests led to a decrease in the  
279 percentage of insects feeding on the AS (Fig. 6A, QUI vs. AS  $X^2_{(1)}= 13.13$ ,  $p= 0.0003$   
280 and CAF vs. AS  $X^2_{(1)}= 15.15$ ,  $p= 0.0001$ ). Note that this feeding avoidance was  
281 persistent even if bitter compounds were absent during tests. This inhibition disappeared  
282 after 60 min (Fig. 6B, n.s.), suggesting the existence of a memory component that lasts  
283 more than 3 but less than 60 min.

284

285 **Discussion**

286 In the present study, we showed for the first time that the bitter modality in the blood-  
287 sucking bug *R. prolixus* is functional and active during feeding. Notably, the detection  
288 of bitter compounds occurs via two sensory paths working with different thresholds of  
289 responsiveness: one starting externally at the tip of the antennae and the other inside the  
290 alimentary canal, probably at the epipharynx. While antennal taste receptors interact  
291 solely with the host skin and never get in contact with the blood of the host, internal  
292 gustatory receptors are confined to the alimentary canal and are therefore exclusively  
293 bathed with the ingested blood during sampling phase and feeding.

294 **Recognition of an adequate substrate**

295 Like most haematophagous invertebrates, triatomines exploit olfactory and thermal cues  
296 emanated by their vertebrate hosts to localize them (Barrozo et al. 2003; Barrozo and  
297 Lazzari, 2004a,b; Bodin et al., 2008). As soon as bugs reach a potential host, they  
298 search for a zone of the skin to pierce, a process which involves the thermal sense  
299 (Lazzari and Nuñez, 1989; Flores and Lazzari, 1996; Ferreira et al., 2007). However, it  
300 was still unknown whether these insects could assess the gustatory quality of the  
301 substrate or not before piercing the skin. Results presented along our work show that  
302 they actually do this. We found that before feeding, *R. prolixus* undergoes a substrate  
303 probing phase in which it evaluates the taste properties of a potential food source and  
304 consequently decides whether to continue the feeding process or not. In our experiments  
305 we observed a decrease in the feeding response of those insects that reached and  
306 contacted a piercing surface impregnated with bitter compounds like QUI and CAF,  
307 even if the offered food was an appetitive solution. Both substances elicited similar  
308 aversive effects at similar concentrations, i.e. 10 mM (Fig. 1).

309 Moreover, we found that the external sensory organs involved in bitter detection during  
310 feeding are located in the antennae and not in the legs or proboscis (Fig. 2). Based in  
311 our electrophysiological results, we confirmed the gustatory function of 4 chaetic  
312 sensilla located in the second flagellum (last segment) of the antennae of *R. prolixus*.  
313 We showed that these taste sensilla respond to QUI and CAF (Fig. 3). Further studies  
314 are needed to determine the number of GRNs inside these sensilla and to extend the  
315 spectrum of taste modalities these insects detect. For example, we observed  
316 electrophysiological dose-dependent responses also to salts like NaCl and KCl (data not  
317 shown).

318 Bitter detection at the periphery normally starts in motion an aversive behavioral  
319 response in insects. The presence of bitter-specific sensitive taste cells have been  
320 described before in insects (Glendinning et al., 1999; Schoonhoven and van Loon, 2002;  
321 Meunier et al., 2003; Weiss et al., 2011). However, there are several examples in which  
322 bitter substances do not act directly via specialized bitter detectors but instead interfere  
323 in the normal perception of phagostimulant receptors (see Chapman, 2003). In the case  
324 of *R. prolixus*, both scenarios could occur: it might happen that insects have bitter  
325 receptors in their antennae, or that bitter substances modulate the response of other  
326 gustatory neurons. In our behavioral experiments we showed that even in the absence of  
327 chemical compounds over the piercing substrate, these insects fed on the AS (e.g. Fig.  
328 1, see group tested to WAT condition), showing that they do not need external contact  
329 with phagostimulants to do it. We also showed that the addition of bitter tastants  
330 inhibited this feeding behavior, suggesting that in these bugs, bitter compounds are  
331 acting independently, probably via specific bitter-receptors instead of interfering in the  
332 response of other gustatory neurons.

### 333 **Recognition of an adequate food**

334 The assessment through antennal taste inputs constitutes the first examination done by  
335 insects giving place to the first decision making: to accept or reject a potential food  
336 source before ingestion starts (Figs. 1, 2). Then, a small gorge of food will be ingested  
337 during the sampling phase as described by Smith and Friend (1970). In our work we  
338 observed all along the experiments that an insect can ingest between 100 and 280  $\mu$ l of  
339 the AS presented alone, increasing up to 15 times its initial weight during a 10 min  
340 alimentation. However, when different bitter tastants (three alkaloids: quinine, caffeine,  
341 berberine and one phenolic glycoside: salicin) were added to the AS the insects  
342 decreased dramatically the ingestion in a dose-dependent manner (Fig. 5), even up to a  
343 total inhibition. The threshold of feeding rejection found for *R. prolixus* ranged from  
344 0.00001 mM (for QUI and SAL) to 0.01 mM (for CAF). Sensitivity thresholds found  
345 for compounds that stimulate bitter-sensitive cells in phytophagous insects varied from  
346 0.1 to 10 mM (see Chapman 2003) and in humans from 0.00001 mM to 50 mM  
347 (Meyerhof et al., 2005).

348 Although most insects have internal taste organs in different parts of their alimentary  
349 canal or mouthparts, their physiology is by far less studied than external receptors,  
350 mainly due to difficulties found to access them with the recording electrodes. In

351 triatomines, Barth (1952) was the first to suggest the existence of a group of  
352 chemosensory structures present in the alimentary canal of *Triatoma infestans*, a related  
353 species to *R. prolixus*, particularly in the epipharynx. In other insects, structures with  
354 similar functions have been described, as for example the cibarial organ of simuliids, tse-  
355 tse flies and ticks (Rice, 1973; John, 1979; McIver and Siemicki, 1981; Foster et al.,  
356 1983; Backus and McLean, 1985; Jefferies, 1987). We propose here that the 8 short-peg  
357 uniporous sensilla observed in the epipharynx of *R. prolixus* (Fig. 5B,C,D) would be  
358 responsible for bitter sensing. However, only an electrophysiological approach would  
359 serve to determine unequivocally this fact.

### 360 **Plasticity of the taste sense**

361 Gustatory stimuli coming from the environment can induce memories in an animal that  
362 may allow them to learn how to discern between good or and bad food sources (Bernays  
363 and Chapman, 2000). This experience-dependent cognitive modulation of the behavior  
364 may be guided by either an associative or a non associative process. Associative  
365 learning is a complex process that allows an individual to convert a previously neutral  
366 stimulus in a predictor of the occurrence of a relevant event. Non-associative processes  
367 are simpler forms of learning that can help an individual to be more prone to respond to  
368 a recently perceived stimulus (sensitization) or to filter out information which is not  
369 longer informative (habituation). Here, we show that both, the substrate probing phase  
370 and the sampling phase of the feeding process of *R. prolixus* are modulated by a  
371 previous sensory experience to bitter compounds. We found that a simple chemical pre-  
372 exposure to QUI and CAF during both phases inhibited the posterior feeding behavior  
373 of *R. prolixus*, even if the bitter compounds were not longer present during tests. This  
374 effect lasted for a brief period (between 3 min and 60 min) (Figs. 4, 6).

375 Although a clear modulation of the behavior of the insects was observed after a non-  
376 associative experience (i.e. a chemical pre-exposure to bitter compounds), results  
377 presented here do not fit in a typical habituation or sensitization category. In these  
378 processes, the response to a particular stimulus “A” decreases or increases after pre-  
379 exposure to the same stimulus “A”. In our case, a pre-exposure to “A” (e.g. any of the  
380 tested bitter compounds) decreased the feeding behavior of bugs in the absence of “A”.  
381 And this decrease was not caused by an impregnation of the antennal taste receptors  
382 with bitter compounds during tests, but mostly to a central integration of aversive input  
383 information. This was shown in the experiments in which we deprived the animals from

384 their antennal tips after pre-exposure and they still did not feed (Fig. 4B). This result  
385 indicates that aversive input centrally modulates the final decision of the insect after a  
386 noxious experience, i.e. not to feed.

387 In nature, this short feeding deterrent memory might allow animals to stop probing  
388 around once a toxic food source was perceived. This plasticity might be important as  
389 whenever a toxic source is found, there is a certain probability to find another toxic one  
390 or even to be still over the same source than before.

### 391 **Bitter compounds for haematophagous insects?**

392 Although bitter is a relevant taste modality involved in the modulation of the decision  
393 making process about to accept or not a potential food source for many animals, the fine  
394 and highly sensitive perception system of *R. prolixus* to bitter substances was quite  
395 surprising for us. What might be the reason for the existence of a bitter detection system  
396 in an obligatory blood-sucking insect? *R. prolixus* feeds exclusively on vertebrate's  
397 blood, a feeding media that intrinsically lacks caffeine, quinine, berberine or salicin.  
398 However, if these compounds are ingested by these host-animals, they can become an  
399 active part of their blood. For example, when herbivores eat hosts plants that produce  
400 bitter compounds, or more recently in evolutionary time, when humans ingest a normal  
401 cup of coffee, a peak of caffeine in their plasma can be found. The peak of caffeine after  
402 a single cup of coffee for men is estimated between 0.001 to 0.01 mM (Fredholm et al.,  
403 1999), which encompasses the doses detected by *R. prolixus*. However, these  
404 haematophagous insects evolved from predatory ancestors, for which the adaptive  
405 pressure of sensing bitter was probably higher. It might occur then that insects  
406 conserved from past ancestors the fine detection system tuned to bitter tastants. In  
407 mosquitoes, which feed on plants (males and females) but also on vertebrates blood  
408 (only females), recent reports showed behavioral and neuronal responses to quinine  
409 (Sanford et al., 2013, Kessler et al., 2013). Although the importance of the gustatory  
410 system in blood-sucking vector-borne diseases during host recognition and feeding has  
411 been neglected in the past, it has lately become an area of interest (Kessler et al., 2013,  
412 Sanford et al., 2013, Bohbot et al 2014, Sparks et al 2013, 2014). The development of  
413 new strategies targeting the gustatory system of haematophagous insects, by using anti-  
414 feedants or bitter compounds, could help to diminish host-vector interactions and thus to  
415 prevent the vectorial transmission.

## 416 **The balance between positive and negative inputs**

417 Insect's feeding response is finally governed by the fine contrast between the presence  
418 of phagostimulatory and aversive inputs. Our study shows that *R. prolixus* has two  
419 sensory stages working with different avoidance thresholds: antennal input exerts a  
420 modulatory bitter signalling at higher doses (10 mM) than internal sensors bathed with  
421 feeding solution, whose bitter threshold is about 6 orders of magnitude below for QUI  
422 and 3 for CAF. Results obtained along this work were summarized and depicted in a  
423 flow chart (Fig. 7). The first assessment of adequateness of a potential food source takes  
424 place at the antennal receptors, during the here named *substrate probing phase* (A). If  
425 bitter compounds are detected at this point (1), the animal will not insert its biting  
426 mouthparts in the host skin and will not feed, restarting a new cycle at the *substrate*  
427 *probing phase*. Conversely, if no aversive compounds are detected (2) the next step is to  
428 pierce the skin and insert their mouthparts in the host (i.e. *piercing phase* (B)).  
429 Subsequently, during the *sampling phase* (C), a small quantity of food is ingested for an  
430 internal quality assessment. If no phagostimulants are detected (3) the animal will  
431 simply not feed. Conversely, if the ingested solution contains phagostimulants, as ATP  
432 and salts (4) the insect will continue with the engorgement (D) up to repletion.  
433 However, if bitter compounds are detected (5) together with the phagostimulants, the  
434 animal will not feed and move backwards in the cycle up to the *piercing phase* or the  
435 *substrate probing phase* to restart the feeding process. We found that for an extended  
436 range of doses, bitter detection attained a more relevant weight in the central decision  
437 about to feed or not, than the phagostimulatory input. Any interactions between  
438 chemicals and neurons that occur at the periphery will alter the phagostimulatory or  
439 aversive inputs changing significantly the balance. Insect's final decision related to host  
440 selection will depend on this balance.

## 441 **Conclusions**

442 Here we demonstrated that *R. prolixus* have taste sensilla localized in the tip of their  
443 antennae that showed electrophysiological sensitivity to bitter compounds like caffeine  
444 and quinine. The perception of bitter stimuli via these external receptors caused an  
445 inhibition of the feeding behavior of bugs during the *substrate probing phase*. Similarly,  
446 this species bears 8 sensilla inside their alimentary canal which might be involved in the  
447 detection of bitter compounds during the *sampling phase*, which also inhibited the  
448 ingestion. The feeding inhibition observed to bitter compounds acts via these two



449 sensory inputs working with different thresholds of tolerance. Finally, by applying a  
450 cognitive approach, we found that the feeding behavior of triatomines can be negatively  
451 modulated by a previous experience with bitter tastants. These results highlight the  
452 relevance of bitter taste perception in the modulation of the feeding behavior of a blood-  
453 sucking insect. Thus, our work acquires a significant importance in the frame of the  
454 development of novel tools that can help in the surveillance and control of this vector  
455 insect.

## 456 **Materials and Methods**

### 457 **Animals and rearing conditions**

458 Fifth instars larvae and adults of *R. prolixus* used throughout the experiments were  
459 obtained from the laboratory colony, reared at 28°C, ambient relative humidity (RH),  
460 12h:12h L/D cycle. Following ecdysis as 5<sup>th</sup> instars or adults, insects did not have  
461 access to food. Experiments were carried out 15±2 days post-ecdysis.

### 462 **Artificial feeder**

463 Along this work we quantified the weight gained by *R. prolixus* fed with different  
464 solutions using an artificial feeder. The *ad hoc* feeding device consisted of two parts:  
465 the *feeding recipient*, made of a plastic cylinder (1 cm diameter x 2 cm height) with its  
466 lower opening closed with a latex membrane (0.125 mm thick) filled-up with an  
467 appetitive solution added or not with different bitter compounds, and the *insect's*  
468 *recipient*, which was a plastic vial (3 cm diameter x 3.5 cm height) where bugs were  
469 individually placed, whose upper openings were covered with a tissue mesh. A piece of  
470 filter paper (1.5 cm x 3.5 cm) placed vertically inside the vial helped the animals to  
471 climb in order to reach the tissue mesh. The mesh could be embedded or not with  
472 different bitter compounds.

473 The feeding recipient was placed close to an aluminum plate connected to a  
474 thermostated resistance that heated the feeding solution to 35°C to match the mean  
475 temperature of triatomines' hosts. The latex membrane in contact with the solution also  
476 acquired the same temperature, mimicking a host skin and acting as a piercing  
477 membrane.

478 Then, feeding experiments started when the tissue mesh of the insect's recipient was  
479 carefully put in contact with the piercing membrane of the feeding recipient (triatomines

480 could easily perforate both with their mouthparts). The feeding assays lasted in all cases  
481 10 minutes.

## 482 **Gustatory stimuli**

483 Preliminary feeding assays carried out in our laboratory in accordance with previous  
484 reports by other authors (Friend and Smith, 1971) showed that a solution of 1 mM ATP  
485 in 0.15 M NaCl evokes a high feeding response in *R. prolixus*. Therefore, for this work  
486 we named it arbitrarily as *appetitive solution* (AS) and we used it along as a  
487 standardized feeding solution.

488 Adenosine 5'-triphosphate disodium salt hydrate (ATP), quinine hydrochloride (QUI),  
489 berberine chloride hydrate (BER) and D-(-) salicin (SAL) were purchased from Sigma-  
490 Aldrich (StLouis, MO, USA). Sodium chloride and caffeine anhydrous were purchased  
491 from Biopack (Buenos Aires, AR). All the solutions were prepared weekly and stored at  
492 -18 °C. In all cases, the pH of the solutions was verified and adjusted when necessary to  
493 7 with NaOH 1 M.

## 494 **Experimental protocols**

495 All the experiments were carried out at the beginning of the insects' scotophase, time of  
496 the day in which triatomines display their maximal motivation to search for a host and  
497 feed (Lorenzo and Lazzari, 1998; Barrozo et al., 2004; Bodin et al., 2008). In each  
498 assay, an unfed larva was weighed before (initial weight,  $W_i$ ) and after (final weight,  
499  $W_f$ ) the feeding tests. A normalized weight gain was calculated as:  $(W_f - W_i) / W_i$ . We  
500 registered then the percentage of insects whose normalized weight gain was higher than  
501 1 (i.e. bugs that ingested at least one time their own weight).

502 The effect of the presence of bitter compounds was studied at two different phases of  
503 the feeding process of triatomines:

504 1- During the substrate probing phase bitter stimuli were added to the substrate: in the  
505 control group 50  $\mu$ l of distilled water were spread over the mesh (WAT). Bitter  
506 stimulation was achieved by spreading 50  $\mu$ l of 1, 10, or 100 mM of QUI or CAF (both  
507 prepared in water) over the mesh of the insect's recipient. Then, the vial was placed in  
508 the artificial feeder and the insect was allowed to feed on the AS for 10 min (Part I in  
509 Results).

510 Additionally, the effect of a previous experience with bitter compounds on the feeding  
511 behavior of insects was studied. Insects were pre-exposed by allowing them to walk for  
512 30 s over a substrate added with WAT, QUI or CAF (10 mM), and 3 min or 60 min  
513 after, their feeding acceptance of AS was tested.

514 2- During the sampling phase bitter stimuli were added to the AS: in the control group,  
515 no bitter compounds were added to the AS. Different doses of QUI, CAF, BER, SAL  
516 (0.000001 mM to 1 mM) were added to the AS in the feeding recipient and offered to  
517 the insects in the artificial feeder for 10 min. In these experiments the substrate was  
518 always clean (Part II in Results).

519 Besides, we analyzed the effect of a brief pre-ingestion of bitter compounds on the  
520 feeding behavior of insects to the AS. Insects were allowed to shortly feed (30 s  
521 accounting from the moment the insect pierced the mesh of the artificial feeder and kept  
522 the proboscis inserted) with the AS alone or added with QUI (0.00001 mM) or CAF  
523 (0.01 mM), and 3 min or 60 min later their feeding response to the AS was evaluated.

#### 524 **Data analysis**

525 Data from behavioral experiments were analyzed by means of contingency tables of  
526 independence (Sokal and Rohlf, 1995). The percentage of insects that exhibited a  
527 normalized weight gain higher than 1 was registered. We statistically tested if the  
528 feeding responses of insects were independent from the different experimental  
529 conditions. A global comparison including all treatments was assessed by means of a  
530 Pearson's Chi-squared test ( $X^2$ ). Then, whenever the global test was statistically  
531 significant ( $\alpha= 0.05$ ), individual post hoc comparisons were done. The standard  
532 deviations of percentages (s.d.) were calculated as  $\sqrt{p(1-p)/N}$ ; p: proportion of response;  
533 N: number of animals tested. Electrophysiological data were statistically analyzed by  
534 using the Wilcoxon test (W). The InfoStat v2012 statistical package was used for the  
535 analyses (Di Rienzo JA, Casanoves F, Balzarini MG, Gonzalez L, Tablada M, Robledo  
536 CW. Grupo InfoStat, FCA, Universidad Nacional de Córdoba, Argentina (URL  
537 <http://www.infostat.com.ar>).

#### 538 **Scanning electron microscopy**

539 The external structures of the tip of the antennae and the interior of the epipharynx  
540 (anterior part of the alimentary canal) of adults of *R. prolixus* were scanned by means of  
541 a scanning electronic microscopy (SEM) in order to search for taste sensilla, putative

542 candidates involved in the substrate/food recognition. The antennae were cut at the base  
543 and mounted horizontally with double-sided tape on a standard aluminum stub. The  
544 epipharynx was exposed by performing a small ventral opening in the anterior part of  
545 the head of the insects. Then the lumen of the alimentary canal was exposed cutting a  
546 second opening that uncovered the internal sensilla. The head was then mounted on an  
547 aluminum stud. All samples were coated successively during 180 s with gold/palladium  
548 (40/60%) before examination in a scanning electron microscope Philips XL 30.

#### 549 **Single-sensillum electrophysiological recordings**

550 The morphological identification of gustatory structures present in the antennae of adult  
551 *R. prolixus* allowed us to carry out electrophysiological recordings on putative taste  
552 sensilla that showed a pore at their tip. Recordings were carried out from the 4 most  
553 apical hairs placed in the last segment of the antennae by measuring the activity of the  
554 sensory neurons housed inside these hairs in response to KCl, QUI or CAF.

555 Insects were secured with wax inside plastic conic supports, with their antennae kept  
556 outside, immobilized with double-sided tape. Following Hodgson et al. (1955)  
557 recording method, animals were grounded via a silver wire to the left eye (reference  
558 electrode) and an individual sensillum was inserted for 3 seconds in a glass electrode  
559 (recording electrode) containing the electrolyte alone (10 mM KCl) or added with the  
560 bitter stimuli (QUI or CAF 0.01, 0.1 and 1 mM presented in ascending order). Each  
561 sensillum was tested first with KCl and then with CAF or QUI in a random order.  
562 Time between subsequent stimulations was fixed to 1 minute.

563 The recording electrode (20-30  $\mu\text{m}$  diameter) was connected to a preamplifier (gain  
564 x10, TastePROBE DTP-02, Syntech) and the biological signals were further amplified,  
565 filtered and digitalized by means of an IDAC4 (Syntech) (gain x100, eight-order Bessel  
566 pass-band filter: 1–3000 Hz, sampling rate: 10 kHz, 16 bits). The data were stored on  
567 computer. Spike detection and analysis were done off-line by using Autospike  
568 (Syntech). The number of spikes was counted to the first second of stimulation.

569

570 **Acknowledgments**

571 This work was funded by the ANPCyT, FONCyT, University of Buenos Aires (grant  
572 number PICT PRH 2009-081 to RBB and PICT PRH 2009-029 to SM), CONICET (PIP  
573 1053 to RBB and SM, and a postdoctoral grant to GP) and Cesar Milstein (to MGdBS).

574 **Author Contributions**

575 G. P., S. M., and R.B.B. conceived of and designed the research; G. P., S. M., I.O.I,  
576 M.G.B.S and R.B.B. collected data; G. P., S. M., M.G.B.S and R.B.B. analyzed data,  
577 interpreted results, and drafted and revised the article.

578 **Competing Interests**

579 The authors have no competing interests.

580 **References**

581

582 **Backus, E. A. and McLean, D. L.** (1985). Behavioral evidence that the precibarial  
583 sensilla of leafhoppers are chemosensory and function in host discrimination. *Ent.*  
584 *Exp. Appl.* **37**, 219-228.

585 **Barrozo, R. B. and Lazzari, C. R.** (2004a). The response of the blood-sucking bug  
586 *Triatoma infestans* to carbon dioxide and other host odours. *Chem. Senses* **29**, 319-  
587 329.

588 **Barrozo, R. B. and Lazzari, C. R.** (2004b). Orientation behaviour of the blood-  
589 sucking bug *Triatoma infestans* to short-chain fatty acids: synergistic effect of L-  
590 lactic acid and carbon dioxide. *Chem. Senses* **29**, 833-841.

591 **Barrozo, R. B. and Lazzari, C. R.** (2006). Orientation response of haematophagous  
592 bugs to CO<sub>2</sub>: the effect of the temporal structure of the stimulus. *J. Comp. Physiol.*  
593 *A.* **192**, 827-831.

594 **Barrozo, R. B., Manrique, G. and Lazzari, C. R.** (2003). The role of water vapour in  
595 the orientation behaviour of the blood-sucking bug *Triatoma infestans* (Hemiptera,  
596 Reduviidae). *J. Insect Physiol.* **49**, 315-321.

597 **Barth, R.** (1952). Anatomical and histological studies on the subfamily Triatominae  
598 (Heteroptera, Reduviidae). The head of *Triatoma infestans*. *Mem. Inst. Cruz* **59**, 69-  
599 107.

600 **Bennet-Clark, H. C.** (1963). Negative pressures produced in the cibarial pump of the  
601 blood sucking bug *Rhodnius prolixus*. *J. Exp. Biol.* **40**, 223-229.

602 **Bernard, J.** (1974). Étude électrophysiologique de récepteurs impliqués dans  
603 l'orientation vers l'hôte et dans l'acte hématophage chez un Hémiptère: *Triatoma*  
604 *infestans*. Doctoral Thesis, University of Rennes, Francia.

605 **Bernays, E. A. and R. F. Chapman.** (2000). Plant secondary compounds and  
606 grasshoppers: Beyond plant defenses. *J. Chem. Ecol.* **26**, 1773-1794.

607 **Bodin, A., Barrozo, R. B., Couton-Brochet, L. and Lazzari, C. R.** (2008).  
608 Chronobiology of an insect sensory perception: temporal modulation and adaptive  
609 control of responses to odours. *J. Insect Physiol.* **54**, 1343-1348.

610 **Bohbot, J. D., Sparks, J. T. and Dickens, J. C.** (2014). The maxillary palp of *Aedes*  
611 *aegypti*, a model of multisensory integration. *Insect Biochem. Mol. Biol.* **48**, 29-39.

612 **Catalá, S. S.** (1998). "Morfology and external anatomy. B: Antennae and rostrum", in  
613 *Atlas of Chagas' disease Vectors in the Americas Volume I*, ed. R. U. Carcavallo, I.

- 614 Galíndez, (Rio de Janeiro, FL: Editora Fiocruz), 74-84.
- 615 **Chapman, R. F.** (2003). Contact chemoreception in feeding by phytophagous insects.  
616 *Annu. Rev. Entomol.* **48**, 455-84.
- 617 **Chapman, R. F., Ascoli-christensen, A. and White, P. R.** (1991). Sensory coding for  
618 feeding deterrence in the grasshopper *Schistocerca americana*. *J. Exp. Biol.* **158**,  
619 241-259.
- 620 **Clyne, P. J., Warr, C. G. and Carlson, J. R.** (2000). Candidate taste receptors in  
621 *Drosophila*. *Science* **287**, 1830-1834.
- 622 **Dunipace, L., Meister, S., McNealy, C. and Amrein, H.** (2001). Spatially restricted  
623 expression of candidate taste receptors in the *Drosophila* gustatory system. *Curr.*  
624 *Biol.* **11**, 822–835.
- 625 **Ferreira, R. A., Lazzari, C. R., Lorenzo, M. G. and Pereira, M. H.** (2007). Do  
626 haematophagous bugs assess skin surface temperature to detect blood vessels? *PLoS*  
627 *ONE* **2**, e932. doi:10.1371/journal.pone.0000932.
- 628 **Flores, G. B. and Lazzari, C. R.** (1996). The role of the antennae in *Triatoma*  
629 *infestans*: orientation towards thermal sources. *J. Insect Physiol.* **42**, 344-440.
- 630 **Foster, S., Goodman, L. J. and Duckett, J. G.** (1983). Sensory receptors associated  
631 with the stylets and cibarium of the rice brown planthopper, *Nilaparvata lugens*. *Cell*  
632 *Tissue Res.* **232**, 111-119.
- 633 **Fredholm, B. B., Bättig, K., Holmén, J., Nehlig, A. and Zvartau, E. E.** (1999).  
634 Actions of caffeine in the brain with special reference to factors that contribute to its  
635 widespread use. *Pharmacol. Rev.* **51**, 83-133.
- 636 **Friend, W. G.** (1965). The gorging response in *Rhodnius prolixus* Stahl. *Can. J. Zool.*  
637 **45**, 125-132.
- 638 **Friend, W. G. and Smith, J. J. B.** (1971). Feeding in *Rhodnius prolixus*: potencies of  
639 nucleoside phosphates in initiating gorging. *J. Insect Physiol.* **17**, 1315-1320.
- 640 **Friend, W. G. and Stoffolano, J. G.** (1983). Feeding responses of the horsefly,  
641 *Tabanus nigrovittatus*, to phagostimulants. *Physiol. Entomol.* **8**, 377-383.
- 642 **Galun, R.** (1967). Feeding Stimuli and Artificial Feeding. *Bull. Org. Mond. Santé Bull.*  
643 *Wld Hlth Org.* **36**, 590-593.
- 644 **Galun, R. and Kindler, S. H.** (1968). Chemical basis of feeding in the tick  
645 *Ornithodoros tholozani*. *J. Insect Physiol.* **14**, 1409–1421.
- 646 **Galun, R. and Nudelman, S.** (1988). Purinergic reception by culicine mosquitoes. *J.*  
647 *Comp. Physiol. A.* **163**, 665-70.

- 648 **Galun, R., Koontz, L. C., Gwadz, R. W. and Ribiero, J. M. C.** (1985). Effect of ATP  
649 analogous on the gorging response of *Aedes aegypti*. *Physiol. Entomol.* **10**, 145-149.
- 650 **Gegear, R. J., Manson, J. S. and Thomson, J. D.** (2007). Ecological context  
651 influences pollinator deterrence by alkaloids in floral nectar. *Ecol. Lett.* **10**, 375-382.
- 652 **Glendinning, J. I., Domdom, S. and Long, E.** (2001). Selective adaptation to noxious  
653 foods by a herbivorous insect. *J. Exp. Biol.* **204**, 3355-3367.
- 654 **Glendinning, J. I., Tarre, M. and Aosaka, K.** (1999). Contribution of different bitter-  
655 sensitive taste cells to feeding inhibition in a caterpillar (*Manduca sexta*). **113**, 840-  
656 854.
- 657 **Guerenstein, P. G and Guerin, P. M.** (2001). Olfactory and behavioural responses of  
658 the blood-sucking bug *Triatoma infestans* to odours of vertebrate hosts. *J. Exp. Biol.*  
659 **204**, 587-597.
- 660 **Guerenstein, P. and Nuñez, J.** (1994). Feeding response of the haematophagous bugs  
661 *Rhodnius prolixus* and *Triatoma infestans* to saline solutions: a comparative study. *J.*  
662 *Insect Physiol.* **40**, 747-752.
- 663 **Hodgson, E. S., Lettvin, J. Y. and Roeder, K. D.** (1955). Physiology of a primary  
664 chemoreceptor unit. *Science* **122**, 417-418.
- 665 **Ignell, R., Okawa, S., Englund, J. E. and Hill, R. S.** (2010). Assessment of diet  
666 choice by the yellow fever mosquito *Aedes aegypti*. *Physiol. Entomol.* **35**, 274-286.
- 667 **Insausti, T. C., Lazzari, C. R. and Campanucci, V. A.** (1999). “Neurobiology of  
668 behaviour. A: Morphology of the nervous system and sense organs”, in *Atlas of*  
669 *Chagas' Disease Vectors in the Americas Volume III*, ed. R. U. Carcavallo, I.  
670 Galíndez Girón, J. Jurberg and H. Lent (Rio de Janeiro, FL: Editorial Fiocruz), 1017-  
671 1051.
- 672 **Jefferies, D.** (1987). Labrocibarial sensilla in the female of the black fly *Simulium*  
673 *damnosum* s.l. (Diptera: Simuliidae). *Can. J. Zool.* **65**, 441-444.
- 674 **John, L. E.** (1979). Chemoreceptors in the cibario-pharyngeal pump of the cabbage  
675 looper moth, *Trichoplusia ni* (Lepidoptera: Noctuidae). *J. Morphol.* **160**, 7-15.
- 676 **Kent, L. B., Walden, K. K. O. and Robertson, H. M.** (2008). The Gr family of  
677 candidate gustatory and olfactory receptors in the yellow-fever mosquito *Aedes*  
678 *aegypti*. *Chem. Senses* **33**, 79–93.
- 679 **Kessler, S., Vlimant, M. and Guerin, P. M.** (2013). The sugar meal of the African  
680 malaria mosquito *Anopheles gambiae* and how deterrent compounds interfere with  
681 it: a behavioural and neurophysiological study. *J. Exp. Biol.* **216**, 1292-1306.



- 682 **Lazzari, C.R. and Núñez, J.A.** (1989). The response to radiant heat and the estimation  
683 of the temperature of distant sources in *Triatoma infestans*. *J. Insect Physiol.* **35**,  
684 525–529.
- 685 **Lorenzo, M. G. and Lazzari, C. R.** (1998). Activity pattern in relation to refuge  
686 exploitation and feeding in *Triatoma infestans* (Hemiptera: Reduviidae). *Acta Trop.*  
687 **70**, 163–170.
- 688 **McIver, S. and Siemicki, R.** (1981). Innervation of cibarial sensilla of *Aedes aegypti*  
689 (L) (Diptera: Culicidae). *J. Morphol. Embriol.* **10**, 335-359.
- 690 **Messchendorp, L., Smid, H. M. and van Loon, J. J. A.** (1998). The role of an  
691 epipharyngeal sensillum in the perception of feeding deterrents by *Leptinotarsa*  
692 *decehlineata* larvae. *J. Comp. Physiol. A.* **183**, 225-264.
- 693 **Meunier, N., Marion-Poll, F., Rospars, J. P. and Tanimura, T.** (2003). Peripheral  
694 coding of bitter taste in *Drosophila*. *J. Neurobiol.* **56**, 139-152.
- 695 **Meyerhof ,W., Behrens, M., Brockhoff, A., Bufe, B. and Kuhn, C.** (2005).  
696 Human bitter taste perception. *Chem. Senses* **30**, 14-15.
- 697 **Rice, M. J.** (1973). Cibarial sense organs of the blowfly, *Calliphora erythrocephala*  
698 (Meigen) (Diptera: Calliphoridae). *J. Morphol. Embriol.* **2**, 109-116.
- 699 **Robertson, H. M., Warr, C. G. and Carlson, J. R.** (2003). Molecular evolution of  
700 the insect chemoreceptor gene superfamily in *Drosophila melanogaster*. *Proc. Natl.*  
701 *Acad. Sci. USA* **100**, 14537–14542.
- 702 **Sanford, J. L., Shields, V. D. C. and Dickens, J. C.** (2013). Gustatory receptor  
703 neuron responds to DEET and other insect repellents in the yellow-fever mosquito,  
704 *Aedes aegypti*. *Naturwissenschaften* **100**, 269–273.
- 705 **Schoonhoven, L. M. and van Loon, J. J. A.** (2002). An inventory of taste in  
706 caterpillars: each species its own key. *Acta Zool. Acad. Sci. Hung.* **48**, 215–263.
- 707 **Scott, K., Brady, R. Jr., Cravchik, A., Morozov, P. and Rzhetsky, A.** (2001). A  
708 chemosensory gene family encoding candidate gustatory and olfactory receptors in  
709 *Drosophila*. *Cell* **104**, 661–673.
- 710 **Smith, J. J. B. and Friend, W. G.** (1982). Feeding behaviour in response to blood  
711 fractions and chemical phagostimulants in the black-fly, *Simulium venustum*.  
712 *Physiol. Entomol.* **7**, 219-226.
- 713 **Smith, J. J. and Friend, W. G.** (1970). Feeding in *Rhodnius prolixus*: Responses to  
714 artificial diets as revealed by changes in electrical resistance. *J. Insect Physiol.* **16**,  
715 1709-1720.

- 716 **Sokal, R. R. and Rohlf, F. J.** (1995). *Biometry: the principles and practice of*  
717 *statistics in biological research.* New York.
- 718 **Sparks, J. T., Bohbot, J. D. and Dickens, J. C.** (2014). The genetics of  
719 chemoreception in the labella and tarsi of *Aedes aegypti*. *Insect Biochem. Mol. Biol.*  
720 **48C**, 8–16.
- 721 **Sparks, J. T., Vinyard, B. T. and Dickens, J. C.** (2013). Gustatory receptor  
722 expression in the labella and tarsi of *Aedes aegypti*. *Insect Biochem. Mol. Biol.* **43**,  
723 1161–1171.
- 724 **Weiss, L. A., Dahanukar, A., Kwon, J. Y., Banerjee, D. and Carlson, J. R.** (2011).  
725 The molecular and cellular basis of bitter taste in *Drosophila*. *Neuron* **69**, 258-272.
- 726 **WHO, World Health Organization.** (2012). Technical Report of the TDR Disease  
727 Reference Group on Chagas Disease, Human African Trypanosomiasis and  
728 Leishmaniasis.
- 729 **Wittstock, U. and Gershenzon, J.** (2002). Constitutive plant toxins and their role in  
730 defense against herbivores and pathogens. *Curr. Opin. Plant Biol.* **5**, 300-307.
- 731 **Yarmolinsky, D. A., Zuker, C. S. and Ryba, N. J.** (2009). Common sense about  
732 taste: from mammals to insects. *Cell* **139**, 234-244.

### 733 **Figure legends**

#### 735 **Figure 1- Effect of external bitter detection on the feeding behavior of *R. prolixus*.**

736 The percentage of insects that fed at least one time their own weight on AS is  
737 represented when the piercing mesh was spread with WAT (dashed line), QUI or CAF  
738 at different concentrations. The addition of high doses of QUI and CAF over the  
739 piercing mesh elicited an inhibitory effect on their feeding behavior. Asterisks denote  
740 statistical differences with the WAT group (Pearson Chi-Square,  $p < 0.05$ ). 20 replicates  
741 were carried out for each concentration. AS: appetitive solution, WAT: water, QUI:  
742 quinine, CAF: caffeine.

#### 743 **Figure 2- Identification of the sensory structures involved in the feeding inhibition** 744 **of *R. prolixus*.** The percentage of insects that fed at least one time their own weight on

745 AS is represented when the piercing mesh was spread with WAT, QUI or CAF. INT:  
746 intact animals, LEG-: animals deprived from legs inputs, ANT-: animals deprived from  
747 antennal inputs (last flagella). Feeding inhibition evoked by externally contacting a

748 bitter substrate occurred in INT and in LEG- groups, and not in ANT-, suggesting that  
749 bitter sensing takes place through taste inputs of the antennae of these insects. Asterisks  
750 denote statistical differences with the corresponding WAT group (Pearson Chi-Square,  
751  $p < 0.05$ ). 20 replicates were carried out for each condition. AS: appetitive solution,  
752 WAT: water, QUI: quinine, CAF: caffeine.

753 **Figure 3- Bitter detection by antennal taste sensilla of *R. prolixus*.** A: photograph of  
754 the last flagellum of the antenna under SEM showing 4 chaetic gustatory sensilla. B:  
755 mean spike frequency of gustatory neurons from these 4 sensilla stimulated with QUI or  
756 CAF at different concentrations. C: typical single-sensillum recordings showing a  
757 gustatory receptor neuron excitatory response to KCl (control), QUI and CAF; spikes  
758 are denoted with a dot beneath the trace. CAF tend to increase the firing rates of the  
759 neurons, although only the highest concentration of CAF was statistically significant.  
760 Asterisk denotes statistical differences with the control (KCl) (Wilcoxon test,  $p < 0.05$ ).  
761 Each dot represents the media and  $\pm$ s.e. of 8 sensilla. QUI: quinine, CAF: caffeine.

762 **Figure 4- Modulation of the feeding behavior of insects by a previous contact with**  
763 **bitter compounds.** The percentage of insects that fed at least one time their own weight  
764 on AS is represented. Insects were pre-exposed to a mesh spread with WAT, QUI or  
765 CAF and then tested 3 min (A) or 60 min (B) later. An external pre-exposure to bitter  
766 compounds evoked a feeding deterrence that lasted more than 3 min but less than 60  
767 min. In C, the feeding test was carried 3min after pre-exposure but the antennal last  
768 flagella of bugs were cut-off immediately after pre-exposure (ANT-). ANT- group pre-  
769 exposed to QUI and CAF also showed feeding inhibition to bitter compounds,  
770 suggesting a central processing of the bitter sensory information and not overstimulation  
771 of taste sensilla. Asterisks denote statistical differences with the corresponding WAT  
772 group (Pearson Chi-Square,  $p < 0.05$ ). 30 replicates were carried out for each condition.  
773 AS: appetitive solution, WAT: water, QUI: quinine, CAF: caffeine, PE: pre-exposure,  
774 T: feeding test.

775 **Figure 5- Effect of internal bitter detection on the feeding behavior of *R. prolixus*.**  
776 The percentage of insects that fed at least one time their own weight on AS alone  
777 (dashed line) or added with QUI, CAF, BER or SAL at different concentrations is  
778 represented. A: the addition of +QUI, +CAF, +BER and +SAL to the AS elicited an  
779 inhibitory effect on the feeding behavior of insects, although at different concentrations.

780 B: photograph of the head showing the base of the antennae (ant), the alimentary canal  
781 (ac), the epipharynx and the eyes (a: anterior, p: posterior) under SEM. C: photograph  
782 of the epipharynx showing 8 short-peg gustatory sensilla. D: detail of one gustatory  
783 sensillum bearing an apical pore. Asterisks denote statistical differences with the AS  
784 group (Pearson Chi-Square,  $p < 0.05$ ). 20 replicates were carried out for each  
785 concentration. AS: appetitive solution, QUI: quinine, CAF: caffeine, BER: berberine,  
786 SAL: salicine.

787 **Figure 6- Modulation of the feeding behavior of insects by a previous ingestion of**  
788 **bitter compounds.** The percentage of insects that fed at least one time their own weight  
789 on AS is represented. Bugs were pre-exposed to HT, AS, AS+QUI or AS+CAF.  
790 Feeding tests to AS were carried out 3min (A) or 60min (B) after pre-exposure. A brief  
791 pre- ingestion of bitter compounds evoked a feeding avoidance to the AS that lasted  
792 more than 3min but less than 60min. Asterisks denote statistical differences with the  
793 corresponding AS group (Pearson Chi-Square,  $p < 0.05$ ). 30 replicates were carried out  
794 for each condition. HT: heat, AS: appetitive solution, QUI: quinine, CAF: caffeine, PE:  
795 pre-exposure, T: feeding test.

796 **Figure 7- Flow chart showing the feeding phases of *R. prolixus* and its modulation**  
797 **by bitter compounds.** During the substrate probing phase (A), if external receptors of  
798 the antennae detect bitter compounds in the substrate (1) insects interrupt the normal  
799 feeding process (2) that leads them to the piercing phase (B). During the sampling phase  
800 (C), once the first gorge of blood is pumped, if no phagostimulants are detected by  
801 internal receptors in the alimentary canal (3), feeding does not continue. Conversely, if  
802 phagostimulants are detected (4) the engorgement (D) starts. However, feeding is  
803 inhibited if bitter compounds are detected in the ingested food (5). Non-fed animals can  
804 restart the feeding cycle at the substrate probing phase (A) or the piercing phase (B).

# FIGURE 1

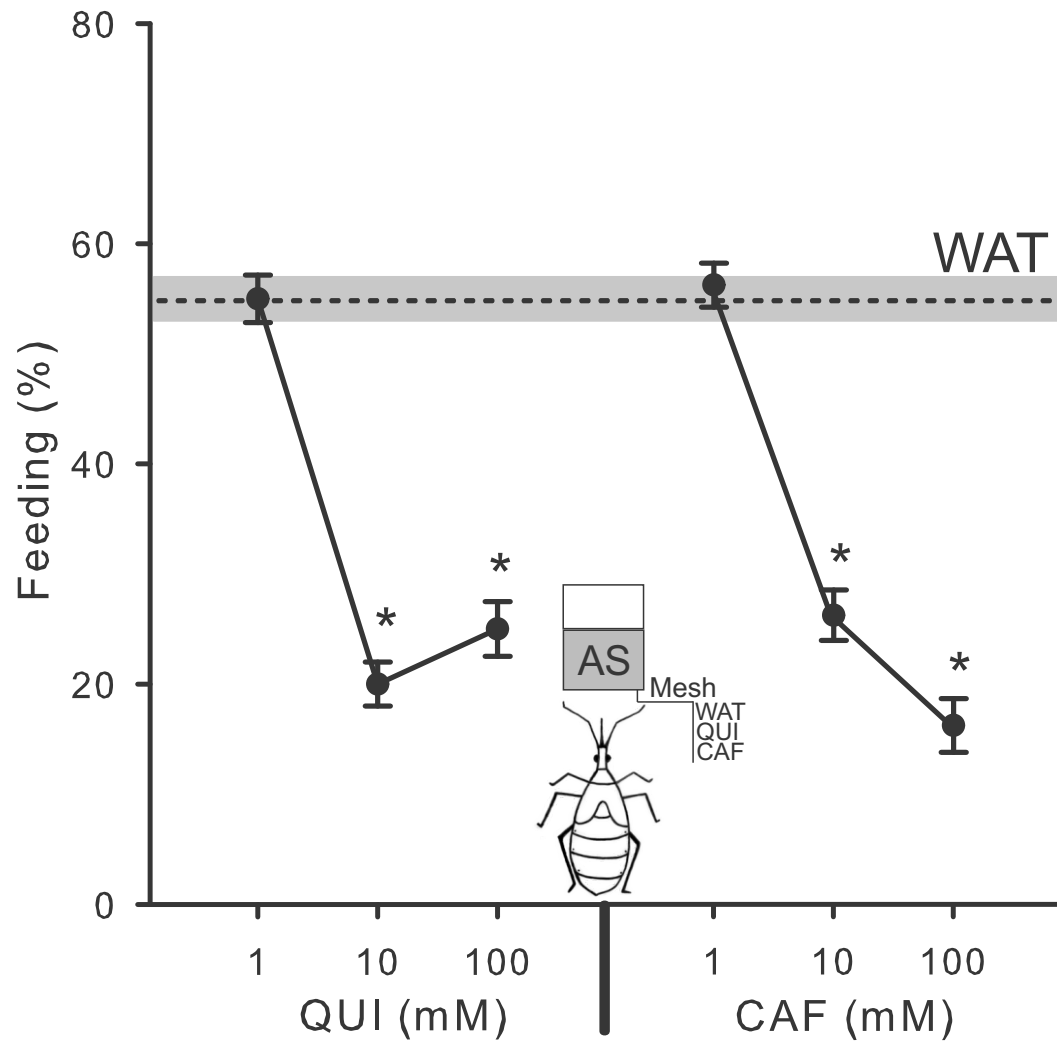

# FIGURE 2

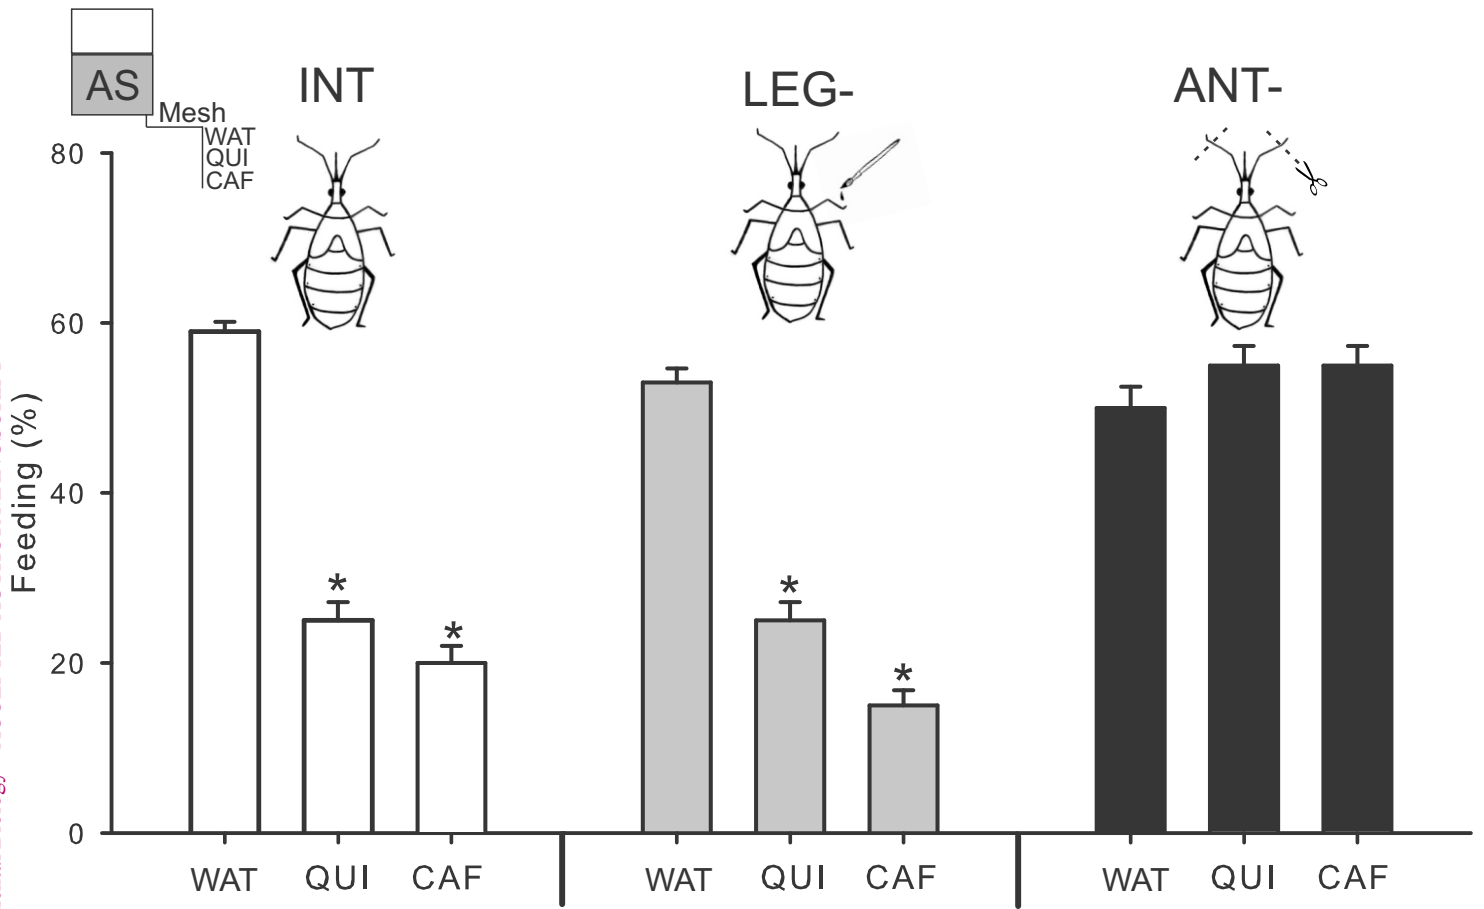

# FIGURE 3

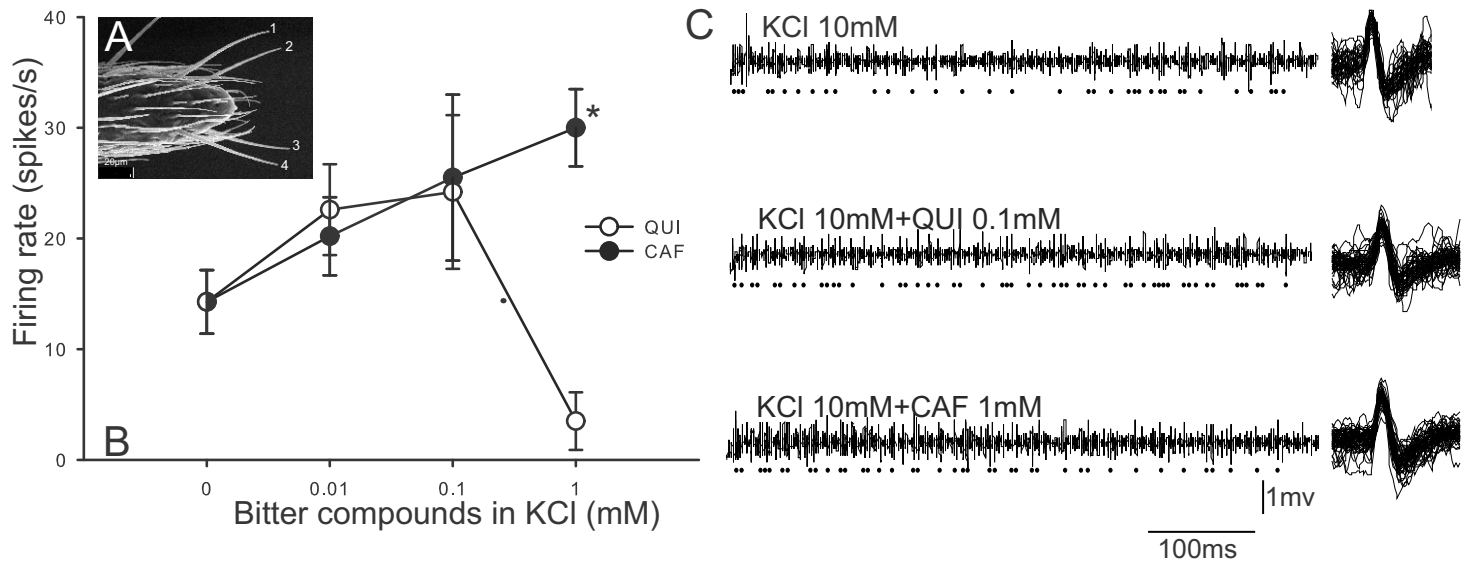

FIGURE 4

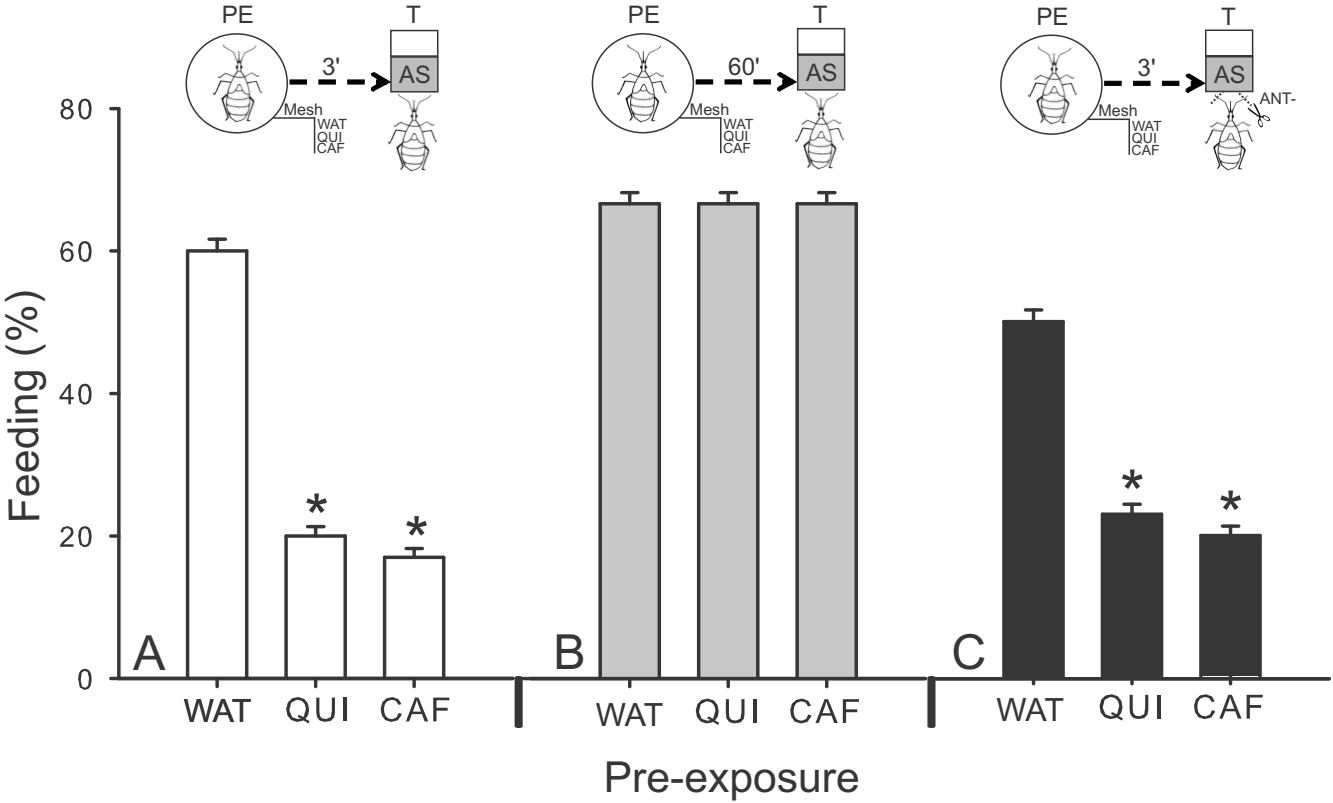



# FIGURE 5

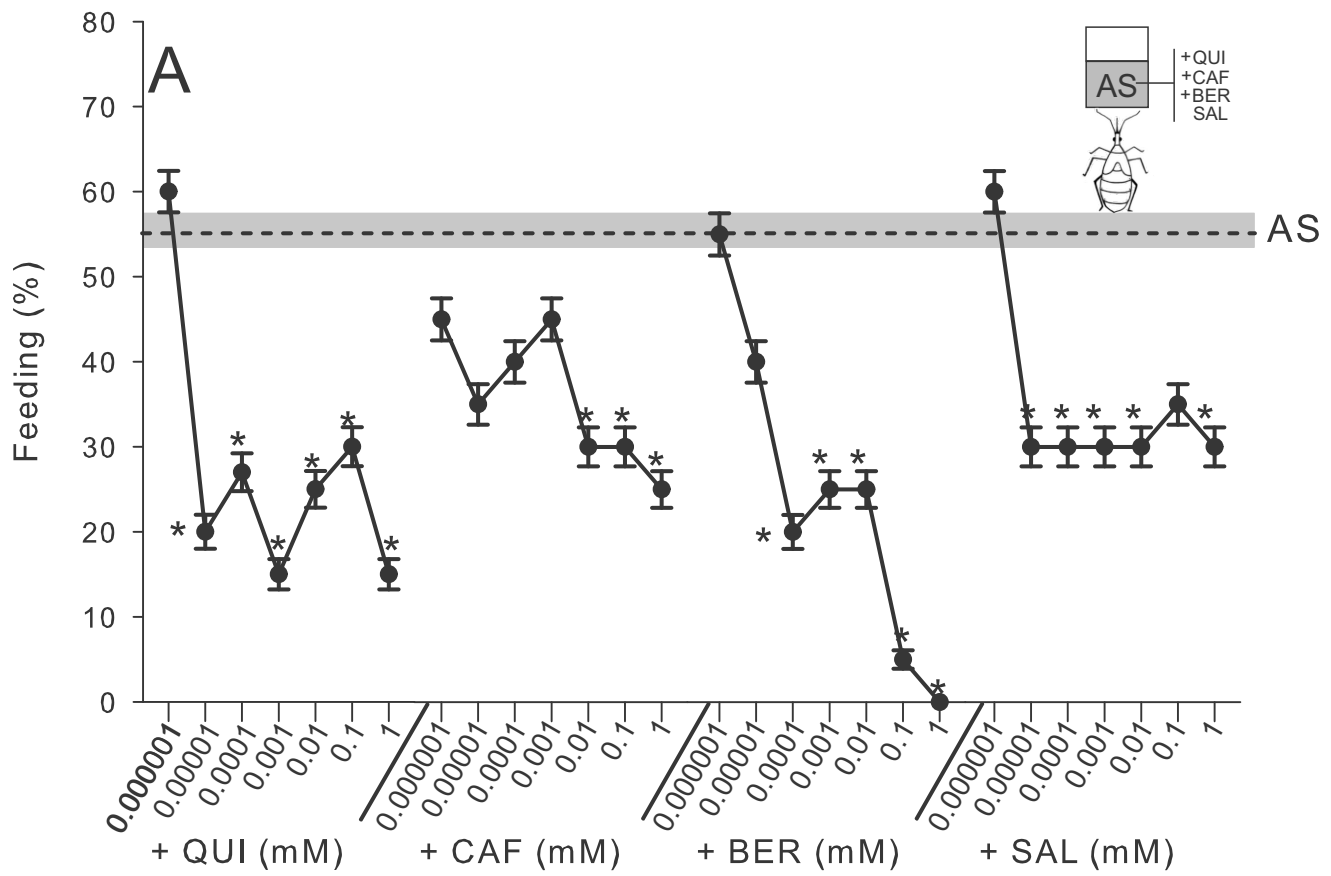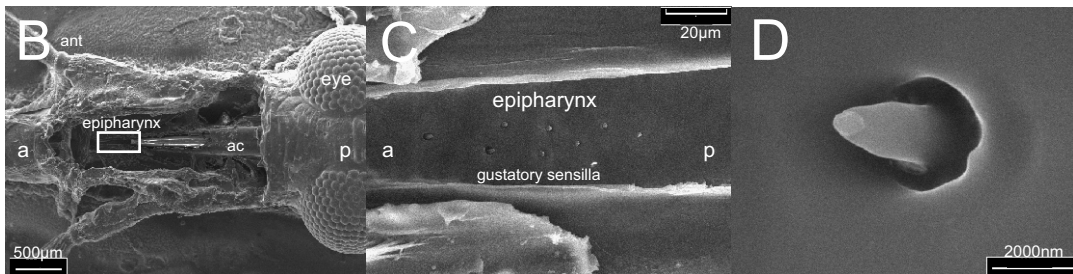

FIGURE 6

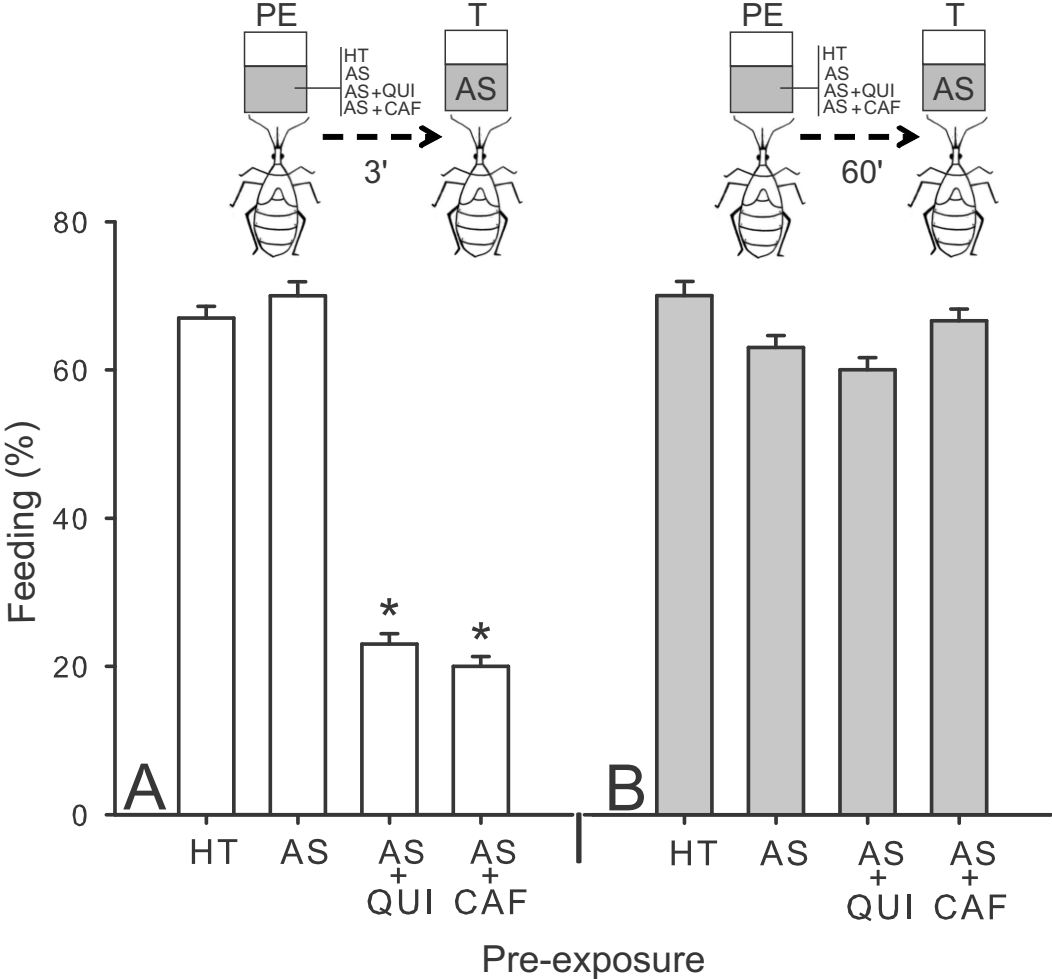

FIGURE 7

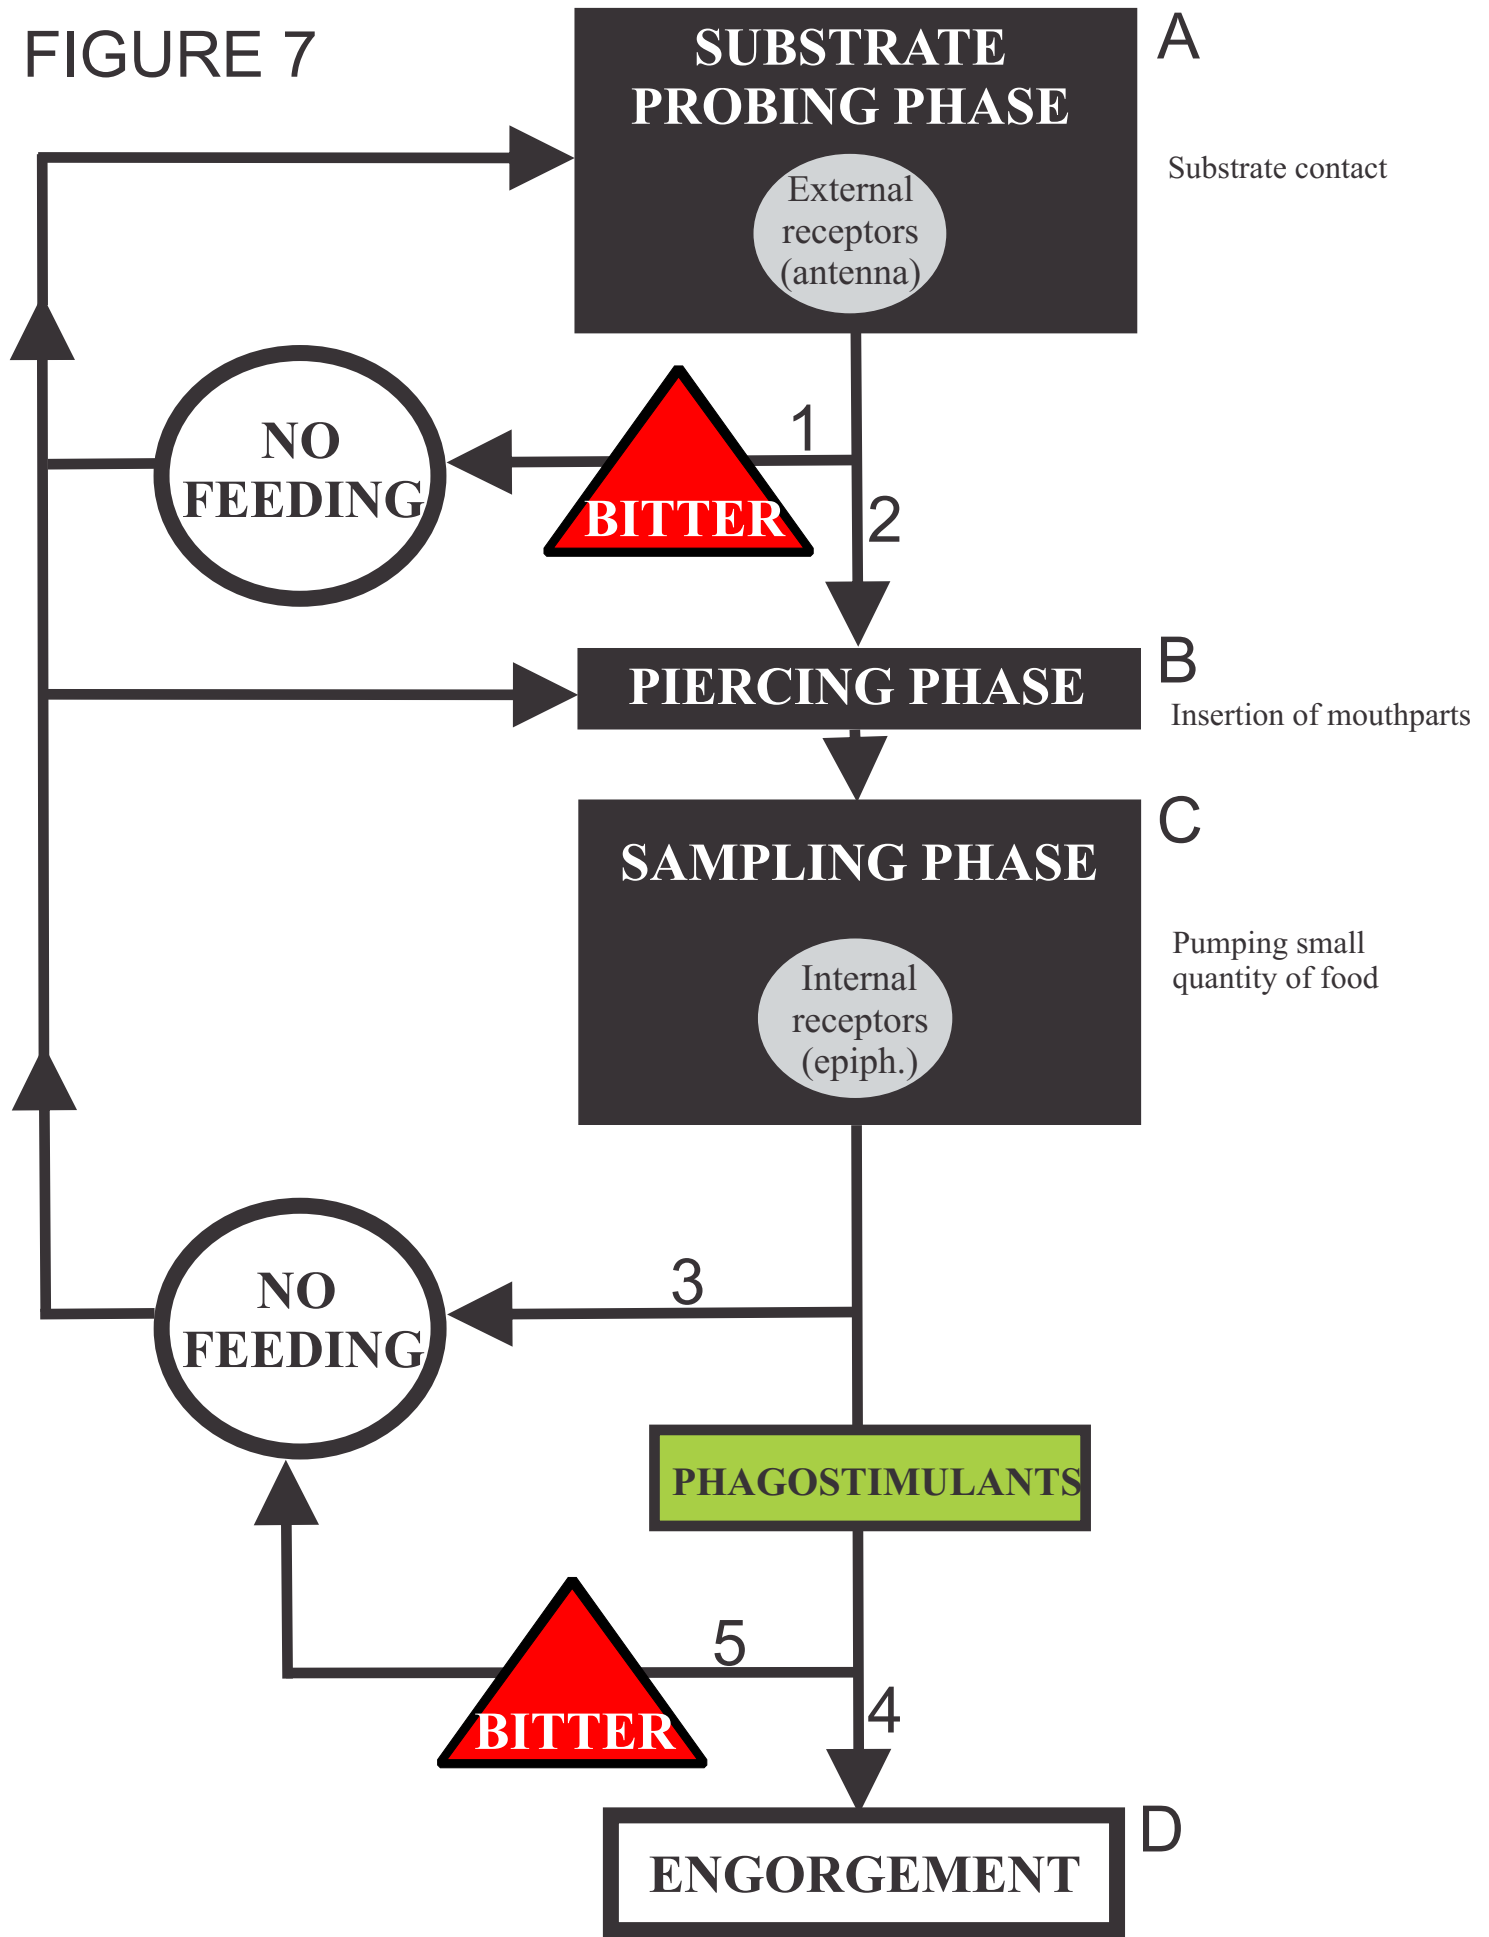

Source: https://cob.silverchair.com/jeb/article-pdf/doi/10.1242/jeb.107722/2037904/jeb_107722.pdf
